# Supplementary material for: Association between Single Nucleotide Polymorphisms of SULT1A1, SULT1C4, ABCC2 and Phase II Flavanone Metabolites Excretion after Orange Juice Intake
Source: MDPI journal article supplement (doi:10.3390/nu14183770), 2022-09-13
Supplement: s1 [file s1]

## Supplementary Material

**Table S1.** Exact test for Hardy-Weinberg equilibrium (n = 46).

| rs8187710     |     |     |     |    |    |              |
|---------------|-----|-----|-----|----|----|--------------|
|               | N11 | N12 | N22 | N1 | N2 | P-value      |
| All subjects  | 40  | 6   | 0   | 86 | 6  | 1            |
| Status=0      | 16  | 5   | 0   | 37 | 5  | 1            |
| Status=1      | 24  | 1   | 0   | 49 | 1  | 1            |
| rs3760091     |     |     |     |    |    |              |
|               | N11 | N12 | N22 | N1 | N2 | P-value      |
| All subjects  | 15  | 26  | 5   | 56 | 36 | 0,35         |
| Metabolites=0 | 6   | 11  | 4   | 23 | 19 | 1            |
| Metabolites=1 | 9   | 15  | 1   | 33 | 17 | 0,18         |
| rs4788068     |     |     |     |    |    |              |
|               | N11 | N12 | N22 | N1 | N2 | P-value      |
| All subjects  | 20  | 21  | 5   | 61 | 31 | 1            |
| Metabolites=0 | 4   | 13  | 4   | 21 | 21 | 0,4          |
| Metabolites=1 | 16  | 8   | 1   | 40 | 10 | 1            |
| rs1402467     |     |     |     |    |    |              |
|               | N11 | N12 | N22 | N1 | N2 | P-value      |
| All subjects  | 25  | 13  | 7   | 63 | 27 | <b>0,039</b> |
| Metabolites=0 | 6   | 10  | 5   | 22 | 20 | 1            |
| Metabolites=1 | 19  | 3   | 2   | 41 | 7  | <b>0,047</b> |

In bold the significant difference  $p < 0.05$ .
